# Supplementary material for: Development of New Bio-Composite of PEO/Silk Fibroin Blends Loaded with Piezoelectric Material
Source: MDPI journal article supplement (doi:10.3390/polym14194209), 2022-10-07

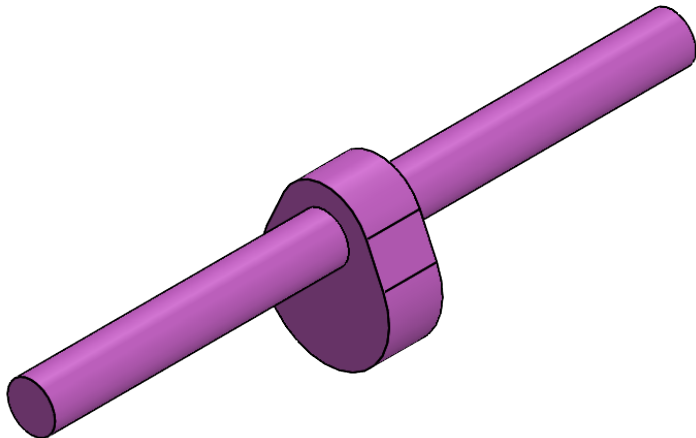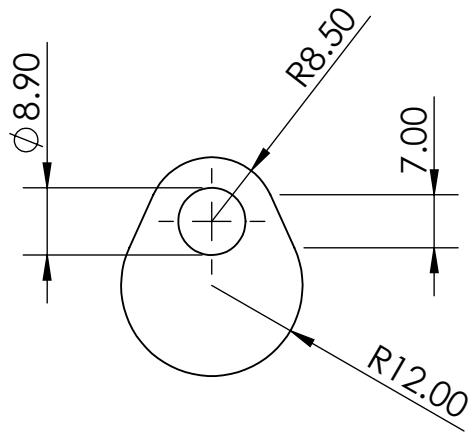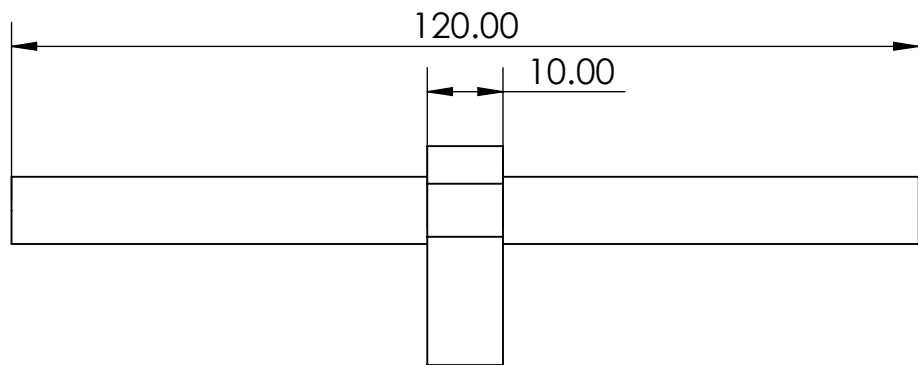

**PROPRIETARY AND CONFIDENTIAL**  
THE INFORMATION CONTAINED IN THIS DRAWING IS THE SOLE PROPERTY OF <INSERT COMPANY NAME HERE>. ANY REPRODUCTION IN PART OR AS A WHOLE WITHOUT THE WRITTEN PERMISSION OF <INSERT COMPANY NAME HERE> IS PROHIBITED.

|             |         |                                      |           |      |      |                                                 |  |  |
|-------------|---------|--------------------------------------|-----------|------|------|-------------------------------------------------|--|--|
|             |         | UNLESS OTHERWISE SPECIFIED:          |           | NAME | DATE | TITLE:                                          |  |  |
|             |         | DIMENSIONS ARE IN INCHES             | DRAWN     |      |      |                                                 |  |  |
|             |         | TOLERANCES:                          | CHECKED   |      |      |                                                 |  |  |
|             |         | FRACTIONAL ±                         | ENG APPR. |      |      |                                                 |  |  |
|             |         | ANGULAR: MACH ±    BEND ±            | MFG APPR. |      |      |                                                 |  |  |
|             |         | TWO PLACE DECIMAL ±                  |           |      |      | SIZE   DWG. NO.   REV<br><b>A</b> cam and shaft |  |  |
|             |         | THREE PLACE DECIMAL ±                | Q.A.      |      |      |                                                 |  |  |
|             |         | INTERPRET GEOMETRIC TOLERANCING PER: | COMMENTS: |      |      |                                                 |  |  |
|             |         | MATERIAL                             |           |      |      |                                                 |  |  |
|             |         | FINISH                               |           |      |      |                                                 |  |  |
| NEXT ASSY   | USED ON |                                      |           |      |      |                                                 |  |  |
| APPLICATION |         | DO NOT SCALE DRAWING                 |           |      |      | SCALE: 1:2   WEIGHT:   SHEET 1 OF 1             |  |  |

B

A

2

1

B

A

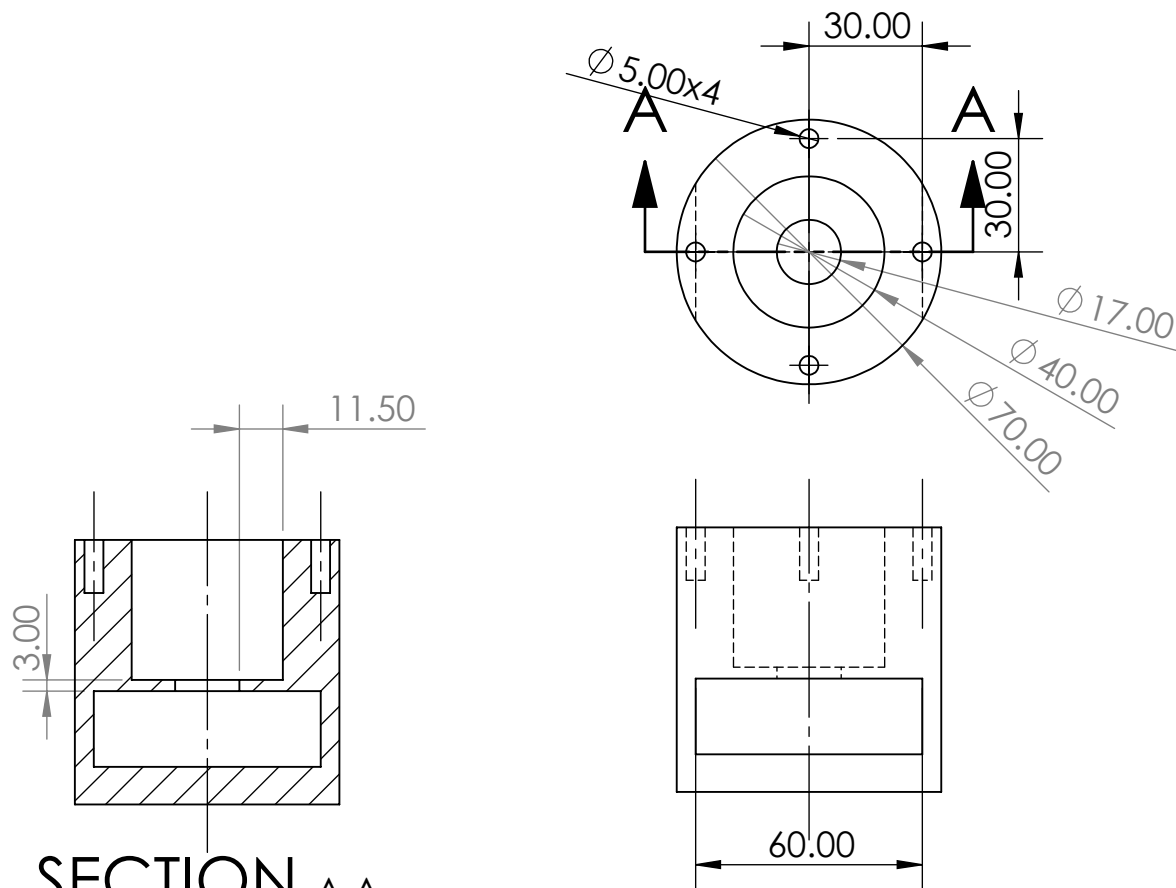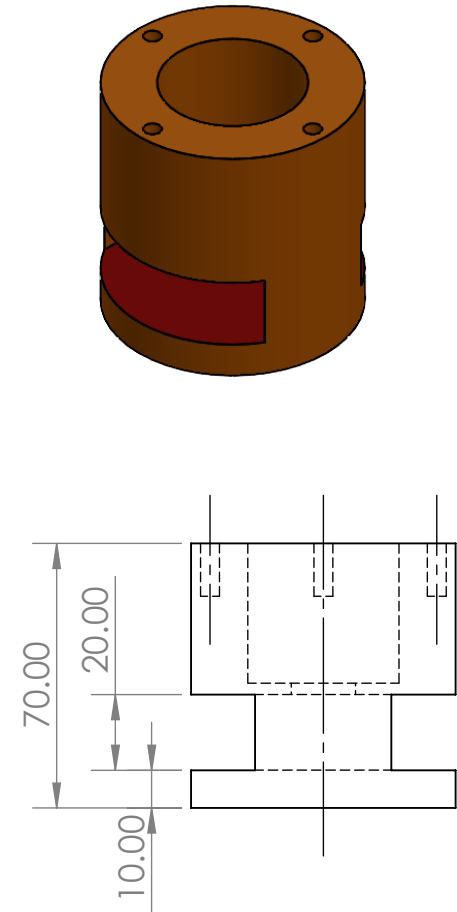

**PROPRIETARY AND CONFIDENTIAL**  
THE INFORMATION CONTAINED IN THIS DRAWING IS THE SOLE PROPERTY OF <INSERT COMPANY NAME HERE>. ANY REPRODUCTION IN PART OR AS A WHOLE WITHOUT THE WRITTEN PERMISSION OF <INSERT COMPANY NAME HERE> IS PROHIBITED.

|             |         |                                |           |      |      |            |          |              |
|-------------|---------|--------------------------------|-----------|------|------|------------|----------|--------------|
|             |         | UNLESS OTHERWISE SPECIFIED:    |           | NAME | DATE | TITLE:     |          |              |
|             |         | DIMENSIONS ARE IN INCHES       | DRAWN     |      |      |            |          |              |
|             |         | TOLERANCES:                    | CHECKED   |      |      |            |          |              |
|             |         | FRACTIONAL $\pm$               | ENG APPR. |      |      |            |          |              |
|             |         | ANGULAR: MACH $\pm$ BEND $\pm$ | MFG APPR. |      |      |            |          |              |
|             |         | TWO PLACE DECIMAL $\pm$        | Q.A.      |      |      | SIZE       | DWG. NO. | REV          |
|             |         | THREE PLACE DECIMAL $\pm$      | COMMENTS: |      |      | <b>A</b>   | Case     |              |
| NEXT ASSY   | USED ON | MATERIAL                       |           |      |      | SCALE: 1:2 | WEIGHT:  | SHEET 1 OF 1 |
| APPLICATION |         | FINISH                         |           |      |      |            |          |              |
|             |         | DO NOT SCALE DRAWING           |           |      |      |            |          |              |

2

1

B

A

B

A

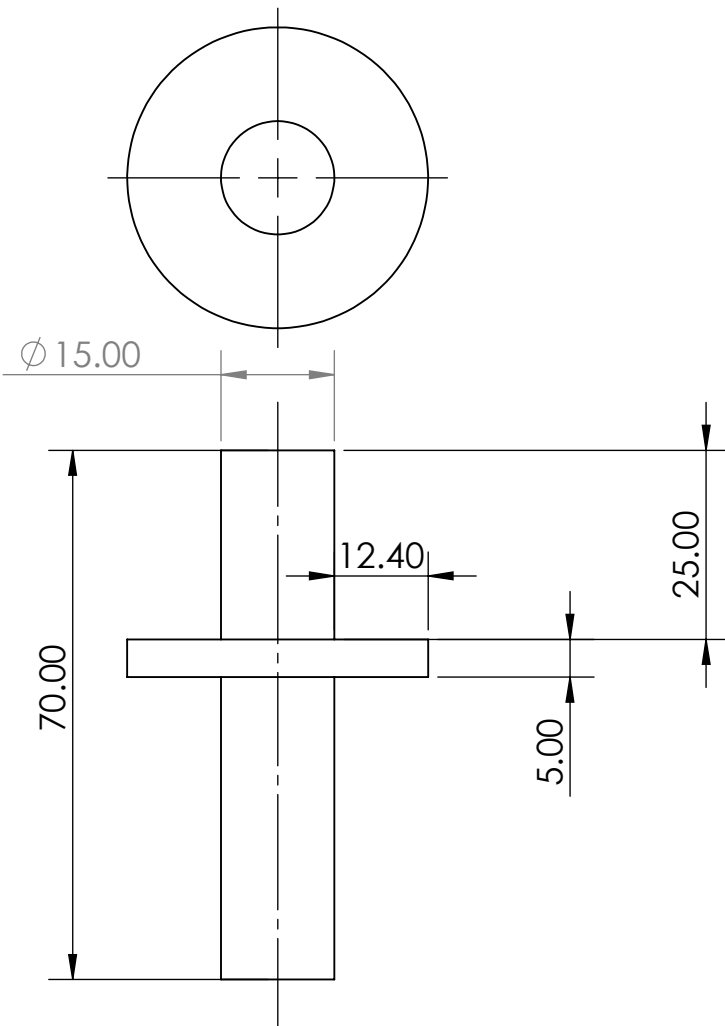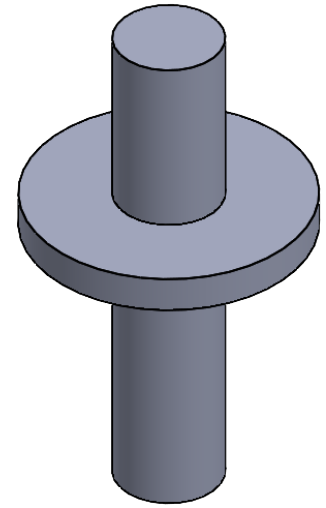

**PROPRIETARY AND CONFIDENTIAL**  
THE INFORMATION CONTAINED IN THIS  
DRAWING IS THE SOLE PROPERTY OF  
<INSERT COMPANY NAME HERE>. ANY  
REPRODUCTION IN PART OR AS A WHOLE  
WITHOUT THE WRITTEN PERMISSION OF  
<INSERT COMPANY NAME HERE> IS  
PROHIBITED.

|             |         |                                         |           |      |      |                                 |  |  |
|-------------|---------|-----------------------------------------|-----------|------|------|---------------------------------|--|--|
|             |         | UNLESS OTHERWISE SPECIFIED:             |           | NAME | DATE | TITLE:                          |  |  |
|             |         | DIMENSIONS ARE IN INCHES                | DRAWN     |      |      |                                 |  |  |
|             |         | TOLERANCES:                             | CHECKED   |      |      |                                 |  |  |
|             |         | FRACTIONAL $\pm$                        | ENG APPR. |      |      |                                 |  |  |
|             |         | ANGULAR: MACH $\pm$ BEND $\pm$          | MFG APPR. |      |      |                                 |  |  |
|             |         | TWO PLACE DECIMAL $\pm$                 | Q.A.      |      |      | SIZE DWG. NO. REV               |  |  |
|             |         | THREE PLACE DECIMAL $\pm$               | COMMENTS: |      |      |                                 |  |  |
|             |         | INTERPRET GEOMETRIC<br>TOLERANCING PER: |           |      |      | A follower                      |  |  |
|             |         | MATERIAL                                |           |      |      |                                 |  |  |
| NEXT ASSY   | USED ON | FINISH                                  |           |      |      | SCALE: 1:1 WEIGHT: SHEET 1 OF 1 |  |  |
| APPLICATION |         | DO NOT SCALE DRAWING                    |           |      |      |                                 |  |  |

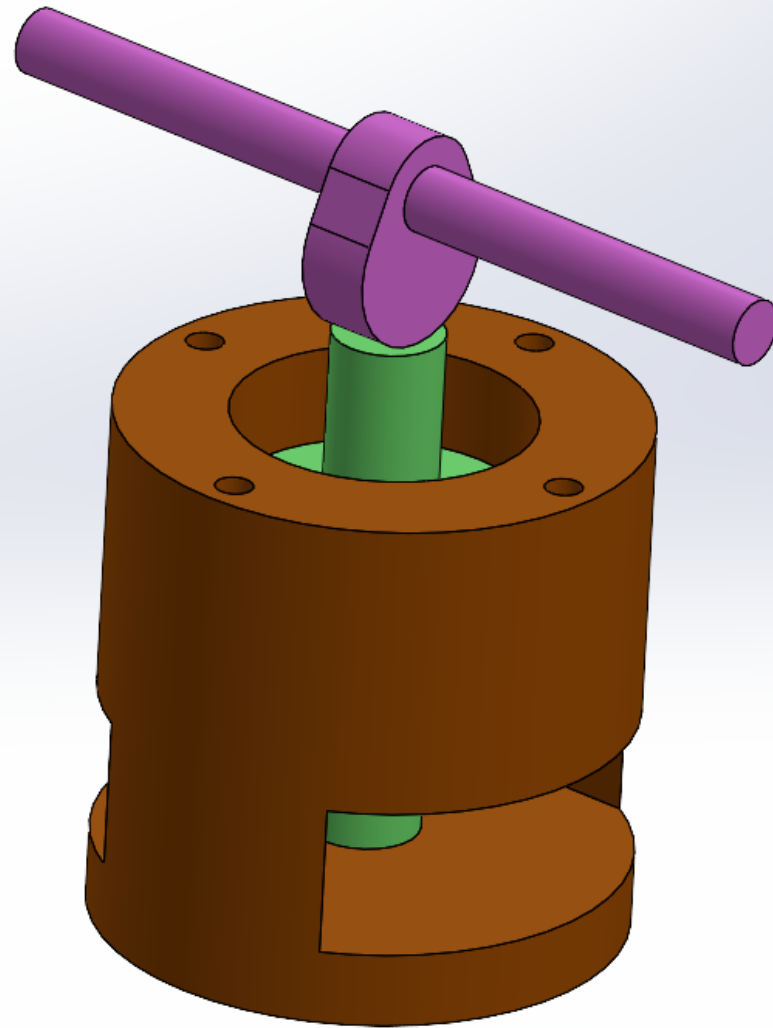

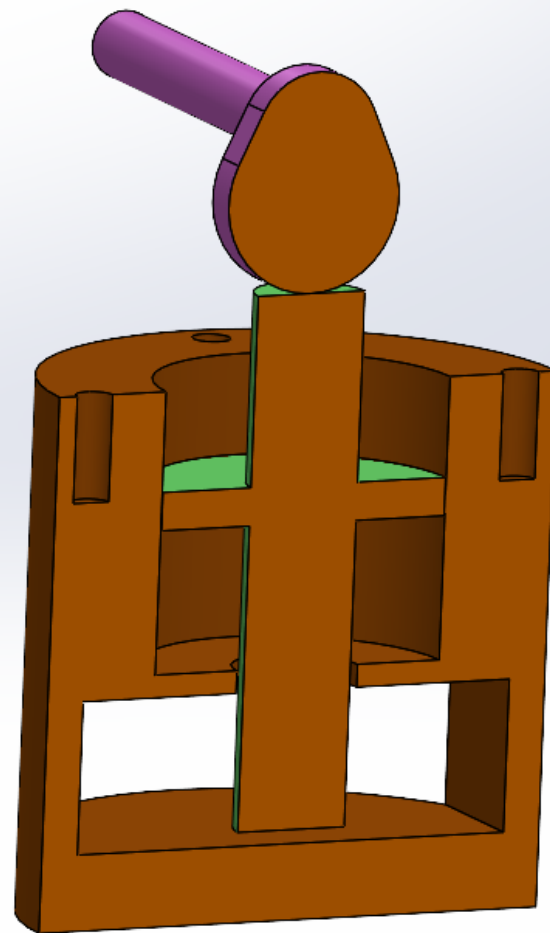

Supplement: s1 [file s1]
